1  
2  
3  
4  
5  
6  
7  
8  
9  
10  
11  
12  
13  
14  
15  
16  
17  
18  
19  
20  
21  
22  
23  
24  
25  
26  
27  
28  
29  
30  
31  
32  
33  
34  
35  
36  
37  
38

Physical and mental health characteristics of adults with subjective  
cognitive decline: A study of 3,407 people aged 18-81 years from an MTurk-based U.S. national sample

Ryan Van Patten<sup>1,2,3</sup>, Tanya T. Nguyen<sup>1,2,3</sup>, Zanjbeel Mahmood<sup>2,4</sup>, Ellen E. Lee<sup>1,3</sup>, Rebecca E. Daly<sup>1,3</sup>,  
Barton W. Palmer<sup>1,2,3</sup>, Tsung-Chin Wu<sup>1,3</sup>, Xin Tu<sup>1,3</sup>, Dilip, V. Jeste<sup>1,3,5¶\*</sup>, Elizabeth W. Twamley<sup>1,2,3¶</sup>

<sup>1</sup>Department of Psychiatry, University of California San Diego, La Jolla, California, United States of America

<sup>2</sup>Veterans Affairs San Diego Healthcare System, San Diego, California, United States of America

<sup>3</sup>Sam and Rose Stein Institute for Research on Aging, University of California San Diego, La Jolla, California, United States of America

<sup>4</sup>San Diego State University/University of California San Diego Joint Doctoral Program in Clinical Psychology, San Diego, California, United States of America

<sup>5</sup>Department of Neurosciences, University of California San Diego, La Jolla, California, United States of America

\*Corresponding Author:  
E-mail: [djeste@health.ucsd.edu](mailto:djeste@health.ucsd.edu) (DVJ)

¶DVJ and EWT are Joint Senior Authors

## 39 **Abstract**

40 Subjective cognitive decline (SCD), or internal feelings of reduced mental capacity, is of increasing  
41 interest in the scientific, clinical, and lay community. Much of the extant literature is focused on SCD as a  
42 risk factor for Alzheimer’s disease in older adults, while less attention has been paid to non-cognitive  
43 health correlates of SCD across adulthood. Consequently, we investigated physical and mental health  
44 correlates of SCD in younger, middle-aged, and older adults. We recruited 3,407 U.S. residents through  
45 Amazon’s Mechanical Turk, an online labor market. Participants completed a 90-item self-report survey  
46 questionnaire assessing sociodemographic characteristics, physical health, sleep, depression, anxiety,  
47 loneliness, wisdom, self-efficacy, and happiness. Overall, 493/1930 (25.5%) of younger adults (18-49)  
48 and 278/1032 (26.9%) of older adults (50 or older) endorsed the SCD item. Multivariate analysis of  
49 variance and follow-up *t*-tests revealed worse physical and mental health characteristics in people  
50 endorsing SCD compared to those who did not, with effect sizes primarily in the medium to large range.  
51 Additionally, age did not moderate relationships between SCD and physical and mental health. Results  
52 suggest that SCD is associated with a diverse set of negative health characteristics such as poor sleep and  
53 high body mass index, and lower levels of positive factors including happiness and wisdom. Effect sizes  
54 of psychological correlates of SCD were as large as (or larger than) those of physical correlates,  
55 indicating that mental health and affective symptoms may be critical to consider when evaluating SCD.  
56 Overall, findings from this large, national U.S. sample suggest the presence of relationships between SCD  
57 and multiple psychological and perceived health factors; our results also show that SCD may be highly  
58 prevalent in both younger and older adults, suggesting that it be assessed across the adult lifespan.

59

60

61

## 62 **Introduction**

63           A self-reported decline in cognitive abilities – i.e., subjective cognitive decline (SCD) – is a  
64 common complaint in older adults with and without objective cognitive deficits (1). A burgeoning  
65 literature in the field of aging research focuses on examining the utility of SCD as an indicator of  
66 underlying pathological age-associated cognitive decline years before the onset of the objective,  
67 measurable symptoms identifiable in mild cognitive impairment (MCI) and dementia (2). However,  
68 whether or not SCD represents an early clinical manifestation of Alzheimer’s disease (AD) pathology  
69 remains to be determined. Studies supporting the utility of SCD have found it to be associated with AD  
70 neurochemical biomarkers (3). Moreover, in a recent review, Jessen and colleagues (4) concluded that  
71 SCD increases risk for pathological cognitive decline on a population level, but that most people with  
72 SCD will not convert to MCI and dementia. In contrast, other studies have found inconsistent associations  
73 between SCD and objective cognitive functioning in preclinical disease phases (1) and, in some cases,  
74 even MCI (5). Moreover, some researchers have reported no relationship between SCD and  
75 neuropathological biomarkers of AD (6), and others have found subjective complaints to be an innocuous  
76 condition with little risk for future cognitive decline (7–9).

77           SCD base rates in older adults are high (27-43% in people in their 60s and 70s; 1), evidence for  
78 SCD as a risk factor for future cognitive decline is inconclusive (4), and the costs of comprehensive  
79 workups for those reporting SCD can be high (10). Moreover, current evidence demonstrates that SCD in  
80 the absence of objective cognitive symptoms is associated with worse physical health (11), subjective and  
81 objective sleep disturbance (12–14), and psychiatric symptom severity (11,14–16). Negative personality  
82 traits (e.g., neuroticism and lower general perceived self-efficacy) have also been linked to SCD in older  
83 adults (11,16,17), underscoring the importance of assessing socioemotional health in the context of SCD.  
84 Consequently, it is important to investigate non-cognitive correlates of SCD in order to better elucidate  
85 the full clinical syndrome and appropriately direct physical and mental healthcare resources.

86           Relative to older adults, non-cognitive correlates of SCD remain under-investigated in non-  
87   clinical samples of younger adults, who are unlikely to experience objective cognitive decline due to  
88   neurodegeneration, despite SCD being reported with equal frequency across all ages (18–22). In  
89   comparison to older adults who more frequently attribute their SCD to intrinsic, age-associated cognitive  
90   decline, younger adults are more likely to attribute SCD to extrinsic, modifiable causes, such as stress,  
91   multitasking, and concentration problems (20,21,23). However, the evaluation of SCD in younger adults  
92   has been restricted primarily to clinical and medical populations (24–26). The few studies that recruited  
93   non-clinical younger and older adults found correlates of SCD to be similar across the two age groups,  
94   underscoring the importance of stress, sleep disturbance, and psychiatric symptom severity in SCD across  
95   the lifespan (14,19–21,27). However, measures of physical functioning were not consistently and/or  
96   comprehensively examined across these studies. Moreover, these studies vary in their recruitment  
97   methods and research setting (e.g., memory clinics, surveys explicitly informing participants of the nature  
98   of the survey), which may influence prognostically-relevant sample sociodemographic/clinical  
99   characteristics (28).

100           Most of the studies in the exiguous lifespan SCD literature have been conducted in  
101   geographically restricted areas (e.g., Korea (27); Paris suburb (21); Portugal (18)), with no prior  
102   investigations in a demographically representative and age-diverse U.S. sample. Furthermore, studies  
103   within the overall SCD literature have not examined the role of psychological constructs such as wisdom,  
104   resilience, and loneliness across the adult lifespan and this information is of essential importance in  
105   situating SCD amongst important health-related constructs. As such, the aims of the current study were to  
106   comprehensively characterize physical and mental health correlates of SCD across the lifespan in a large,  
107   demographically diverse US sample. We recruited participants using Amazon’s Mechanical Turk (AMT),  
108   an online labor market allowing for the rapid acquisition of high quality data at low cost (29–33). Based  
109   on previously reviewed literature, we hypothesized that, compared to participants who do not endorse  
110   SCD (SCD-), those who endorse SCD (SCD+) would report worse physical and mental health.

111 Furthermore, because of the well-known impact of aging on cognition, we explored the moderating effect  
112 of age on the relationship between SCD status and mental/physical health.

## 113 **Methods**

### 114 **Participants**

115 We recruited 3,407 people, aged 18-81, from AMT (see Table 1). Participants completed a 90-  
116 item online survey during a five-week period in spring 2019. The description of the survey, visible on  
117 AMT read, “*We are looking for people to answer questions about a variety of topics, including age,*  
118 *gender, mood, wisdom, and sleep, among others.*” We described the survey in general terms so as to  
119 reduce sampling bias and enhance generalizability. Interested participants consented to the study by  
120 selecting a hyperlink, which routed them to the questionnaire, presented via SurveyGizmo.

121 ..... Table 1 About Here .....

122 We paid each worker \$1.00 for survey completion. Inclusion criteria were the following: 1)  $\geq 18$   
123 years old, 2) English-speaking, 3) residing in the U.S., and 4) a Human Intelligence Task Approval rate  
124  $>90\%$  (32). We initially recruited 2,289 participants and found that the age distribution was skewed  
125 toward younger adults. In order to balance the sample with respect to age, we added 250 more  
126 participants aged 35-45, 500 participants aged 45-55, and 368 participants aged 55+, leading to the initial  
127 sample size of 3,407.

128 Although AMT workers provide high quality data overall (29,31,33–38), a subset may be  
129 inattentive or may provide invalid data for other reasons. In order to address this issue, we excluded  
130 participants who provided impossible or highly improbable answers to survey items. Specifically, we  
131 excluded participants who, 1) completed the survey in  $<270$  seconds ( $n=104$ ), 2) reported values for  
132 height and weight leading to a body mass index (BMI) $<16$  ( $n=165$ ), 3) reported fewer total close friends  
133 than the number of close friends seen at least once per month ( $n=252$ ), 4) reported their height at  $<3$  feet  
134 or  $>7$  feet ( $n=42$ ), 5) reported living with  $\geq 20$  people in their household ( $n=12$ ), and/or 6) reported owning  
135  $\geq 40$  pets ( $n=3$ ). Overall, 336 participants provided one invalid response, 86 participants provided two

136 invalid responses, 22 participants provided three invalid responses, and 1 participant provided four invalid  
137 responses. Applying these exclusion criteria resulted in 445 (13.1%) participants being excluded, leaving  
138 a final sample of 2,962 participants for analysis.

139 This project, including a request for a waiver of documented consent, was reviewed through the  
140 UC San Diego Human Research Protections Program by an IRB Chair and/or the IRB Chair's designee  
141 and certified as exempt from IRB review under 45 CFR 46.104(d), Category 2.

## 142 **Materials**

143 Within the 90-item survey, we measured SCD with a single item (“*Have you noticed a decline in*  
144 *your memory and thinking that is worrisome to you? [Yes/No]*”). We attempted to minimize the length of  
145 the survey as much as possible; consequently, we selected empirically-supported abbreviated versions of  
146 all measures with the exception of the San Diego Wisdom Scale (SD-WISE), which does not have a short  
147 form. We measured multiple sociodemographic characteristics including age, sex, education, race, annual  
148 income, marital status, and employment status. To assess physical health, we administered one item  
149 inquiring about frequency of flossing (once per week, 2-3 times per week, 4-6 times per week, or daily;  
150 39), two items measuring height and weight to calculate body mass index (BMI), one item asking whether  
151 or not any medications are taken for medical conditions, the 12-item Medical Outcomes Survey-Short  
152 Form (assessing physical and mental health related quality of well-being; 39), the 4-item Patient-Reported  
153 Outcomes Measurement Information System (PROMIS) Sleep Disturbance-short form (41), and the 1-  
154 item PROMIS sleep apnea question (41). We measured depression with the 2-item Patient Health  
155 Questionnaire (PHQ-2; 42) and anxiety with the 2-item version Generalized Anxiety Disorder scale (43).  
156 We measured loneliness with the 4-item version of the UCLA Loneliness Scale (44), using the anchors  
157 from the third edition of the UCLA scale, *never*, *rarely*, *sometimes*, and *always*, rather than those of  
158 Russel et al. (44), *never*, *rarely*, *sometimes*, and *often*. Measures of positive psychological factors  
159 included the 24-item SD-WISE (45), the 2-item Connor-Davidson Resilience Scale (46), and the 4-item  
160 Happiness Factor from the Center for Epidemiologic Studies-Depression scale (47). The SD-WISE

161 includes the following subscales: Decisiveness, Emotional Regulation, Pro-Social Behaviors, Social  
162 Advising, and Tolerance for Divergent Values. We assessed social self-efficacy using four items, with  
163 minor wording modifications, from the Social Self-Efficacy Scale (48,49) that was originally developed  
164 for use with adolescents. These four items were selected for age-appropriateness and included: (1) “*How*  
165 *well can you become friends with other people?*,” (2) “*How well can you have a chat with an unfamiliar*  
166 *person?*,” (3) “*How well can you tell other people that they are doing something you don’t like?*,” and (4)  
167 “*How well can you succeed in preventing quarrels with other people?*”.

## 168 **Statistical Analyses**

169 We analyzed the data using SPSS 26.0. We first examined distributional characteristics of all  
170 continuous variables. For those that were highly skewed, we used appropriate non-parametric tests. Next,  
171 we tested our hypothesis with SCD group as the between-subjects predictor (“independent”) variable and  
172 physical and mental health scores as outcome (“dependent”) variables. Casual inference cannot be  
173 established with this cross-sectional data, but our main focus was to test whether SCD status predicted  
174 physical and mental health levels. We ran an omnibus multivariate analysis of variance (MANOVA),  
175 followed by independent samples *t*-tests for each continuous variable; due to low missing data rates (<4%  
176 for all variables and <1% for all variables except for frequency of flossing), we used the classic  
177 MANOVA procedure rather than the generalized estimating equations procedure (50). For the two  
178 categorical outcome variables (presence or absence of medications and sleep apnea), we conducted  $\chi^2$   
179 tests. With regard to the exploratory analysis, we conducted 2-group (SCD+ versus SCD-) X 2-age cohort  
180 (older: 50+ versus younger: 18-49) ANOVAs on the physical and mental health variables listed in Table 1  
181 in order to examine the possible moderating effect of age. We dichotomized age into two groups in order  
182 to contrast younger adults with older adults, given that the majority of the current SCD literature exists in  
183 aging populations. Although some researchers define older adults beginning in the 60s, we were  
184 interested in “young-old” adults, and our sample of “old-old” adults was small, likely due to our use of an  
185 internet-based data collection platform (AMT).

186 We report appropriate effect sizes for all statistical tests – partial  $\eta^2$  for the MANOVA, Cohen’s  $d$   
187 for  $t$  tests, and Cramer’s  $V$  for  $\chi^2$  tests. We used the False Discovery Rate to control for Type I error, with  
188 alpha set at  $p < .05$ . The False Discovery Rate predicts and controls individual false positive results, while  
189 simultaneously maintaining a high level of statistical power relative to familywise error rate methods such  
190 as the Bonferroni correction (51). All statistical tests were two-tailed.

## 191 **Results**

192 Overall, 493/1930 (25.5%) of younger adults (18-49) and 278/1032 (26.9%) of older adults (50 or  
193 older) endorsed the SCD item,  $\chi^2(1) = .68, p = .41$ . For continuous variables with non-normal distributions,  
194 results from non-parametric tests (Mann Whitney  $U$ s) mirrored those from parametric statistics. For ease  
195 of interpretation, we present the parametric results for all continuous variables. Of the demographic  
196 variables, sex, education, employment status, and annual income differed significantly across the two  
197 groups; however, when we added these variables to the models as covariates, results did not differ. For  
198 ease of interpretation, we provide unadjusted parameters.

199 With respect to our hypothesis that the SCD+ group would report worse physical and mental  
200 health compared to the SCD- group, the MANOVA was statistically significant,  $F(11, 2937) = 46.47,$   
201  $p < .001, \lambda = 0.85, \eta_p^2 = .15$ . In univariate analyses, all physical and mental health variables differed in the  
202 hypothesized direction, with the exception of SD-WISE Tolerance for Diverging Values subscale.  
203 Specifically, compared to the SCD- group, the SCD+ group reported higher BMI, greater rate of taking  
204 medications for medical conditions, less frequent flossing, worse overall self-reported physical health,  
205 higher rates of self-reported sleep disturbance and sleep apnea, worse overall mental health, higher rates  
206 of depression, anxiety, and loneliness, and lower scores on scales for resilience, happiness, wisdom, and  
207 self-efficacy (see Table 1). Moreover Cohen’s  $d$  effect sizes were primarily in the medium (0.50) to large  
208 (0.80) range. When we split the sample by age (18-49 and 50+) for the exploratory analysis, interaction  
209 terms for the 2-SCD group X 2-Age group ANOVAs were all non-significant, suggesting that age did not  
210 moderate the relationship between SCD and physical or mental health.



## 211 **Discussion**

212           Most research efforts to investigate SCD have been focused on understanding its relationship to  
213 objective cognitive decline (52,53) and its importance as an early risk factor for MCI and dementia in  
214 older adults (4,54). Although the literature on SCD as a marker of early cognitive decline in older adults  
215 is growing rapidly, much less is known about SCD as a general construct, especially its physical and  
216 mental health correlates in non-clinical populations across the adult lifespan. The present study evaluated  
217 self-reported physical and psychological correlates of SCD in a large survey sample of adults aged 18-81.  
218 As hypothesized, both younger and older adults who endorsed SCD exhibited worse self-reported  
219 physical health symptoms and psychological traits/states compared to those who did not endorse SCD.  
220 Compared to SCD- participants, SCD+ participants had higher mean BMI, were more likely to take  
221 medications for medical conditions, were more likely to have sleep apnea or other sleep disturbances, and  
222 were less likely to floss. They also reported worse physical well-being, worse mental well-being, higher  
223 depression and anxiety symptoms, greater loneliness, and lower levels of resilience, happiness, wisdom,  
224 and self-efficacy. Age did not moderate the relationship between SCD and either physical or  
225 psychological functioning. Overall, our findings are consistent with previous literature suggesting that  
226 SCD is associated with worse physical health (11), subjective and objective sleep disturbance (12–14),  
227 and psychiatric symptom severity (11,14–16), and that SCD correlates are similar across the lifespan in  
228 both younger and older adults (19,21,27). To our knowledge, this study is the first large-scale  
229 investigation of SCD rates to include a non-clinical sample of younger adults in the U.S. Notably, the  
230 prevalence of SCD did not differ between younger and older adults, which was unexpected. Previous  
231 studies have reported similar rates of SCD in younger adults (approximately 25-29%) but higher rates in  
232 older adults (20,27). A possible explanation for the lack of difference in SCD between younger and older  
233 adults is that our older adult sample recruited through AMT may be different than those in other clinical  
234 studies. Nevertheless, other studies have found SCD to be as frequent, though qualitatively different, in  
235 young adults compared to older adults (18,21).

236 Depression and anxiety symptoms demonstrated the strongest relationships to SCD, with  
237 moderate-to-large (Cohen's  $d \geq 0.70$ ) effect sizes. This finding is consistent with earlier studies, which  
238 suggest that the relationship between SCD and symptoms of depression and anxiety is complex.  
239 Depression moderates the relationship between SCD and objective cognitive impairment (14,55).  
240 Moreover, although depression and anxiety are closely related and highly comorbid, they are associated  
241 with different risk factors; pure anxiety tends to be associated with a wide range of stress-related factors,  
242 none of which are associated with pure depression (56). One factor common to both is personal mastery,  
243 or perceived behavioral control, which may be a cognitive psychological marker of trait vulnerability for  
244 both depression and anxiety (56). Depression interacts with personal mastery and general self-efficacy  
245 such that the association between depressive symptoms and SCD may be stronger in participants with  
246 higher feelings of perceived mastery and social self-efficacy (11). Our data revealed that individuals who  
247 endorsed SCD exhibited lower levels of self-efficacy. Memory complaints may reflect a general state of  
248 diminished psychological or mental well-being, which was also observed in this study.

249 We also observed strong associations between SCD and negative/positive psychological factors,  
250 including loneliness, resilience, happiness, and wisdom (Cohen's  $d \geq 0.30$ ). In each case, SCD was  
251 related to higher levels of negative and lower levels of positive psychological factors, and effect sizes of  
252 psychological correlates were as large as (or larger) than those of physical correlates, suggesting that  
253 psychological features may be associated with SCD as much as physical functioning. These results  
254 represent a unique contribution to the current SCD literature and have important clinical implications. The  
255 associations between SCD and negative/positive psychological factors point to possible areas of  
256 intervention. For example, increasing one's subjective cognitive experience may improve resilience and  
257 happiness and decrease levels of loneliness; conversely, interventions aimed at improving psychological  
258 factors may improve one's subjective cognitive experience.

259 Wisdom is a complex, multidimensional personality trait that is comprised of several specific  
260 components, including pro-social behaviors such as empathy and compassion, emotional regulation, self-  
261 reflection or insight, acceptance of divergent values, decisiveness, and social advising (57–59). Although

262 it is often conflated with intelligence, wisdom encompasses cognitive, affective, and reflective  
263 dimensions (60). Among the wisdom subscales of the SD-WISE, the cognitive (decisiveness) and  
264 affective (emotional regulation) components of wisdom were the strongest correlates of SCD. The  
265 decisiveness component entails the cognitive abilities and dispositional qualities related to making  
266 decisions. The emotional regulation component pertains to the ability to maintain emotional homeostasis.  
267 Although the latter can be reflective of psychological distress, one of the items (e.g., *I cannot filter my*  
268 *negative emotions*) also involves an aspect impulse control related to frontal executive functions,  
269 specifically response inhibitory (57). Thus, it is not surprising that individuals with SCD would have  
270 lower decisiveness and emotional regulation. At the same time, it is worth stress that positive traits are  
271 potentially modifiable. There is growing literature on interventions designed to enhance levels of positive  
272 traits such as resilience and components of wisdom including emotional regulation (61,62).

273 In addition, individuals with SCD reported greater loneliness, which has been previously  
274 identified as a major risk factor for adverse mental and physical health outcomes, including cognitive  
275 decline and dementia (63–66). (Please see our companion paper, Nguyen et al. (67), for description of  
276 detailed analyses of loneliness and associated factors within this MTurk sample.)

277 With regard to physical functioning, SCD had the strongest relationship with self-reported sleep  
278 disturbances and overall physical well-being, consistent with previous literature (27). Disrupted sleep can  
279 contribute to both subjective and objective experiences of cognitive impairment (12,68). Similarly,  
280 presence of sleep disorders – namely, obstructive sleep apnea (OSA) – has been associated with SCD.  
281 Although cognitive deficits have been well documented in patients with OSA, the relationship between  
282 SCD and objective impairment in OSA remains unclear (69). SCD in combination with subjective sleep  
283 disturbance and OSA may represent early prodromal signs for developing MCI or dementia (70).

284 The present study has notable strengths. It includes a large sample of nearly 3,000 adults across  
285 the adult lifespan with sociodemographic diversity in terms of gender, race, and socioeconomic status.  
286 Utilization of the AMT online crowdsourcing marketplace allowed for access to thousands of research  
287 participants from demographically diverse backgrounds from around the US, without geographic

288 restrictions (29). Recruitment through internet samples may reduce biases from traditional samples (71)  
289 and better approximate US census data (72–76). Moreover, we took the precaution of using general terms  
290 to describe the survey so as to reduce sampling bias and enhance generalizability. Although the  
291 unsupervised nature of data collection potentially reduces reliability and validity, many studies have  
292 shown that AMT data quality is equivalent to that acquired in controlled settings (29,31–33,38,76) and  
293 excluded participants who provided impossible or highly implausible responses to survey items to ensure  
294 validity of results. Furthermore, our study included a comprehensive assessment of physical and mental  
295 health factors, including positive and negative psychological traits/states, which, to our knowledge, have  
296 never been simultaneously investigated in the context of SCD. Overall, our findings provide a more  
297 comprehensive understanding of the physical and psychological characteristics, above and beyond  
298 psychopathology, associated with SCD.

299         Nevertheless, this investigation also had several limitations. The presence of SCD was  
300 determined using a single yes-no question, rather than a more detailed method of inquiry or standardized  
301 measure, which restricted our ability to assess SCD severity and capture complaints in specific cognitive  
302 domains. Many self-report measures have been used to investigate SCD (77), but there is no established  
303 gold standard method of assessment (78). Moreover, in our experience, this mode of assessment is more  
304 pragmatic and consistent with typical clinical practice, and most individuals with impairments in other  
305 cognitive domains (e.g., attention/concentration, language, executive function) often perceive these  
306 problems as memory difficulties. Due to restrictions of the AMT platform, all data are self-report, which  
307 has well known limitations due to recall and response bias (79,80). Although the assessment of subjective  
308 cognitive decline requires self-report by definition, this represents a limitation with regard to reports of  
309 physical health and functioning. Relatedly, we did not administer performance-based cognitive tests to  
310 determine objective cognitive impairment. Finally, the cross-sectional design limits our ability to draw  
311 causal inferences regarding SCD and its correlates, and future prospective longitudinal studies are needed  
312 to clarify these relationships.

## 313 **Conclusions**

314           Notwithstanding these limitations, the current study contributes to important research aimed at  
315 better understanding the non-cognitive aspects of SCD. Our findings help to characterize the wide range  
316 of physical and psychological correlates of SCD. Notably, although definitive causal conclusions are  
317 limited by reliance on subjective self-reports, the effect sizes of psychological correlates of SCD were as  
318 large as (or larger) than those of physical correlates, indicating that mental health and psychological  
319 features are critical to consider when evaluating SCD.

## 320 **Acknowledgements**

321 The authors thank all the study participants for their contributions to this work.

## 322 **Funding**

323 Funding for this study was provided, in part, by the National Institute of Mental Health T32 Geriatric  
324 Mental Health Program (grant MH019934 to DVJ [PI]), by the Stein Institute for Research on Aging at  
325 the University of California, San Diego, and by the K23 MH118435 to TTN [PI].

326

327

328

329

330

331

332

333

334

335

## 336 **References**

- 337 1. Reid LM, Maclullich AMJ. Subjective memory complaints and cognitive impairment in older people.  
338 *Dement Geriatr Cogn Disord*. 2006;22(5–6):471–85.
- 339 2. Jessen F, Amariglio RE, van Boxtel M, Breteler M, Ceccaldi M, Chételat G, et al. A conceptual  
340 framework for research on subjective cognitive decline in preclinical Alzheimer’s disease.  
341 *Alzheimers Dement*. 2014 Nov;10(6):844–52.
- 342 3. Visser PJ, Verhey F, Knol DL, Scheltens P, Wahlund L-O, Freund-Levi Y, et al. Prevalence and  
343 prognostic value of CSF markers of Alzheimer’s disease pathology in patients with subjective  
344 cognitive impairment or mild cognitive impairment in the DESCRIPA study: a prospective cohort  
345 study. *Lancet Neurol*. 2009 Jul;8(7):619–27.
- 346 4. Jessen F, Amariglio RE, Buckley RF, van der Flier WM, Han Y, Molinuevo JL, et al. The  
347 characterisation of subjective cognitive decline. *Lancet Neurol*. 2020 Mar;19(3):271–8.
- 348 5. Edmonds EC, Delano-Wood L, Galasko DR, Salmon DP, Bondi MW, Alzheimer’s Disease  
349 Neuroimaging Initiative. Subjective cognitive complaints contribute to misdiagnosis of mild  
350 cognitive impairment. *J Int Neuropsychol Soc*. 2014 Sep;20(8):836–47.
- 351 6. Garcia-Ptacek S, Cavallin L, Kåreholt I, Kramberger MG, Winblad B, Jelic V, et al. Subjective  
352 cognitive impairment subjects in our clinical practice. *Dement Geriatr Cogn Dis Extra*. 2014  
353 Sep;4(3):419–30.
- 354 7. Hessen E, Eckerström M, Nordlund A, Selseth Almdahl I, Stålhammar J, Bjerke M, et al. Subjective  
355 cognitive impairment is a predominantly benign condition in memory clinic patients followed for 6  
356 years: the Gothenburg-Oslo MCI Study. *Dement Geriatr Cogn Dis Extra*. 2017 Feb 2;7(1):1–14.
- 357 8. Hollands S, Lim YY, Buckley R, Pietrzak RH, Snyder PJ, Ames D, et al. Amyloid- $\beta$  related memory  
358 decline is not associated with subjective or informant rated cognitive impairment in healthy adults. *J*  
359 *Alzheimers Dis*. 2015;43(2):677–86.
- 360 9. Mol MEM, van Boxtel MPJ, Willems D, Jolles J. Do subjective memory complaints predict cognitive  
361 dysfunction over time? A six-year follow-up of the Maastricht Aging Study. *Int J Geriatr Psychiatry*.  
362 2006 May;21(5):432–41.
- 363 10. Beck C, Cody M, Souder E, Zhang M, Small GW. Dementia diagnostic guidelines: methodologies,  
364 results, and implementation costs. *J Am Geriatr Soc*. 2000 Oct;48(10):1195–203.
- 365 11. Comijs HC, Deeg DJH, Dik MG, Twisk JWR, Jonker C. Memory complaints; the association with  
366 psycho-affective and health problems and the role of personality characteristics: a 6-year follow-up  
367 study. *J Affect Disord*. 2002 Nov;72(2):157–65.
- 368 12. Lauriola M, Esposito R, Delli Pizzi S, de Zambotti M, Londrillo F, Kramer JH, et al. Sleep changes  
369 without medial temporal lobe or brain cortical changes in community-dwelling individuals with  
370 subjective cognitive decline. *Alzheimers Dement*. 2017 Jul 1;13(7):783–91.
- 371 13. Miley-Akerstedt A, Jelic V, Marklund K, Walles H, Åkerstedt T, Hagman G, et al. Lifestyle factors  
372 are important contributors to subjective memory complaints among patients without objective

- 373 memory impairment or positive neurochemical biomarkers for Alzheimer's disease. *Dement Geriatr*  
374 *Cogn Dis Extra*. 2018 Nov 28;8(3):439–52
- 375 14. Stenfors CUD, Marklund P, Magnusson Hanson LL, Theorell T, Nilsson L-G. Subjective cognitive  
376 complaints and the role of executive cognitive functioning in the working population: a case-control  
377 study. *PLoS One*. 2013 Dec 26;8(12):e83351.
- 378 15. Balash Y, Mordechovich M, Shabtai H, Giladi N, Gurevich T, Korczyn AD. Subjective memory  
379 complaints in elders: depression, anxiety, or cognitive decline? *Acta Neurol Scand*. 2013  
380 May;127(5):344–50.
- 381 16. Slavin MJ, Brodaty H, Kochan NA, Crawford JD, Trollor JN, Draper B, et al. Prevalence and  
382 predictors of “subjective cognitive complaints” in the Sydney Memory and Ageing Study. *Am J*  
383 *Geriatr Psychiatry*. 2010 Aug;18(8):701–10.
- 384 17. Steinberg SI, Negash S, Sammel MD, Bogner H, Harel BT, Livney MG, et al. Subjective memory  
385 complaints, cognitive performance, and psychological factors in healthy older adults. *Am J*  
386 *Alzheimers Dis Other Demen*. 2013 Dec;28(8):776–83.
- 387 18. Ginó S, Mendes T, Maroco J, Ribeiro F, Schmand BA, de Mendonça A, et al. Memory complaints  
388 are frequent but qualitatively different in young and elderly healthy people. *Gerontology*.  
389 2010;56(3):272–7.
- 390 19. Ponds R, van Boxtel MPJ, Jolles J. Age-related changes in subjective cognitive functioning. *Educ*  
391 *Gerontol*. 2000 Jan;26(1):67–81.
- 392 20. Ponds RW, Commissaris KJ, Jolles J. Prevalence and covariates of subjective forgetfulness in a  
393 normal population in the Netherlands. *Int J Aging Hum Dev*. 1997;45(3):207–21.
- 394 21. Derouesné C, Lacomblez L, Thibault S, LePoncin M. Memory complaints in young and elderly  
395 subjects. *Int J Geriatr Psychiatry*. 1999 Apr;14(4):291–301.
- 396 22. Begum A, Dewey M, Hassiotis A, Prince M, Wessely S, Stewart R. Subjective cognitive complaints  
397 across the adult life span: a 14-year analysis of trends and associations using the 1993, 2000 and 2007  
398 English Psychiatric Morbidity Surveys. *Psychol Med*. 2014 Jul;44(9):1977–87.
- 399 23. Vestergren P, Nilsson L-G. Perceived causes of everyday memory problems in a population-based  
400 sample aged 39–99. *Appl Cogn Psychol*. 2011;25(4):641–6.
- 401 24. Au A, Cheng C, Chan I, Leung P, Li P, Heaton RK. Subjective memory complaints, mood, and  
402 memory deficits among HIV/AIDS patients in Hong Kong. *J Clin Exp Neuropsychol*. 2008  
403 Apr;30(3):338–48.
- 404 25. Weis J, Poppelreuter M, Bartsch HH. Cognitive deficits as long-term side-effects of adjuvant therapy  
405 in breast cancer patients: ‘subjective’ complaints and ‘objective’ neuropsychological test results.  
406 *Psychooncology*. 2009 Jul;18(7):775–82.
- 407 26. Rayner G, Wrench J, Wilson S. Differential contributions of objective memory and mood to  
408 subjective memory complaints in refractory focal epilepsy. *Epilepsy and Behav*. Nov;19(3):359–64

- 409 27. Lee JE, Ju YJ, Park E-C, Lee SY. Effect of poor sleep quality on subjective cognitive decline (SCD)  
410 or SCD-related functional difficulties: results from 220,000 nationwide general populations without  
411 dementia. *J Affect Disord*. 2020 Jan 1;260:32–7.
- 412 28. Rodríguez-Gómez O, Abdelnour C, Jessen F, Valero S, Boada M. Influence of sampling and  
413 recruitment methods in studies of subjective cognitive decline. *J Alzheimers Dis*. 2015 Sep 24;48  
414 Suppl 1:S99–107.
- 415 29. Buhrmester M, Kwang T, Gosling SD. Amazon’s Mechanical Turk: a new source of inexpensive, yet  
416 high-quality, data? *Perspect Psychol Sci*. 2011 Jan;6(1):3–5.
- 417 30. Hara K, Adams A, Milland K, Savage S, Callison-Burch C, Bigham JP. A data-driven analysis of  
418 workers’ earnings on Amazon Mechanical Turk. In: *Proceedings of the 2018 CHI Conference on*  
419 *Human Factors in Computing Systems - CHI ’18*. Montreal QC, Canada Association for Computing  
420 Machinery; 2018. (CHI ’18). p. 1–14.
- 421 31. Litman L, Robinson J, Rosenzweig C. The relationship between motivation, monetary compensation,  
422 and data quality among US- and India-based workers on Mechanical Turk. *Behav Res Methods*. 2015  
423 Jun;47(2):519–28.
- 424 32. Mason W, Suri S. Conducting behavioral research on Amazon’s Mechanical Turk. *Behav Res*  
425 *Methods*. 2012 Mar;44(1):1–23.
- 426 33. Sprouse J. A validation of Amazon Mechanical Turk for the collection of acceptability judgments in  
427 linguistic theory. *Behav Res Methods*. 2011;43(1):155–67.
- 428 34. Coppock A. Generalizing from survey experiments conducted on Mechanical Turk: a replication  
429 approach. *Political Sci Res Methods*. 2019 Jul;7(3):613–28.
- 430 35. Hauser DJ, Schwarz N. Attentive Turkers: MTurk participants perform better on online attention  
431 checks than do subject pool participants. *Behav Res Methods*. 2016 Mar;48(1):400–7.
- 432 36. Horton JJ, Rand DG, Zeckhauser RJ. The online laboratory: conducting experiments  
433 in a real labor market. *Exp Econ*. 2011 Sep 1;14(3):399–425.
- 434 37. Mortensen K, Hughes TL. Comparing Amazon’s Mechanical Turk platform to conventional data  
435 collection methods in the health and medical research literature. *J Gen Intern Med*. 2018  
436 Apr;33(4):533–8.
- 437 38. Peer E, Vosgerau J, Acquisti A. Reputation as a sufficient condition for data quality on Amazon  
438 Mechanical Turk. *Behav Res Methods*. 2014 Dec;46(4):1023–31.
- 439 39. Hujoel PP, Cunha-Cruz J, Kressin NR. Spurious associations in oral epidemiological research: the  
440 case of dental flossing and obesity. *J Clin Periodontol*. 2006 Aug;33(8):520–3.
- 441 40. Ware JE, Snow KK, Kosinski M, Gandek B. *Health survey manual and interpretation guide*. The  
442 Health Institute, New England Medical Center; 1997.
- 443 41. Cella D, Riley W, Stone A, Rothrock N, Reeve B, Yount S, et al. Initial adult health item banks and  
444 first wave testing of the Patient–Reported Outcomes Measurement Information System (PROMIS™)  
445 network: 2005–2008. *J Clin Epidemiol*. 2010 Nov;63(11):1179–94.



- 446 42. Kroenke K, Spitzer RL, Williams JBW. The Patient Health Questionnaire-2: validity of a two-item  
447 depression screener. *Med Care*. 2003 Nov;41(11):1284–92.
- 448 43. Kroenke K, Spitzer RL, Williams JBW, Monahan PO, Löwe B. Anxiety disorders in primary care:  
449 prevalence, impairment, comorbidity, and detection. *Ann Intern Med*. 2007 Mar 6;146(5):317–25.
- 450 44. Russell D, Peplau LA, Cutrona CE. The revised UCLA Loneliness Scale: concurrent and  
451 discriminant validity evidence. *J Pers Soc Psychol*. 1980 Sep;39(3):472–80.
- 452 45. Thomas ML, Bangen KJ, Palmer BW, Martin A, Avanzino JA, Depp C, et al. A new scale for  
453 assessing wisdom based on common domains and a neurobiological model: the San Diego Wisdom  
454 Scale (SD-WISE). *Journal of Psychiatric Research*. 2019 Jan 1;108:40–7.
- 455 46. Davidson J. Connor-Davidson Resilience Scale (CDRISC) Manual. Unpublished. Accessible at  
456 [www.cdrisc.com](http://www.cdrisc.com); 2018.
- 457 47. Fowler JH, Christakis NA. Dynamic spread of happiness in a large social network: longitudinal  
458 analysis over 20 years in the Framingham Heart Study. *BMJ*. 2008 Dec 4;337:a2338.
- 459 48. Muris P. Relationships between self-efficacy and symptoms of anxiety disorders and depression in a  
460 normal adolescent sample. *Pers Individ Dif*. 2002 Jan 19;32(2):337–48.
- 461 49. Zullig KJ, Teoli DA, Valois RF. Evaluating a brief measure of social self-efficacy among U.S.  
462 adolescents. *Psychol Rep*. 2011 Dec;109(3):907–20.
- 463 50. Tang W, He H, Tu X. *Applied Categorical and Count Data Analysis*. New York, NY: Chapman &  
464 Hall/CRC; 2012.
- 465 51. Benjamini Y, Hochberg Y. Controlling the false discovery rate: a practical and powerful approach to  
466 multiple testing. *J R Stat Soc Series B Stat Methodol*. 1995;57(1):289–300.
- 467 52. Kielb S, Rogalski E, Weintraub S, Rademaker A. Objective features of subjective cognitive decline  
468 in a United States national database. *Alzheimers Dement*. 2017 Dec;13(12):1337–44.
- 469 53. Koppara A, Wagner M, Lange C, Ernst A, Wiese B, König H-H, et al. Cognitive performance before  
470 and after the onset of subjective cognitive decline in old age. *Alzheimers Dement (Amst)*. 2015  
471 Jun;1(2):194–205.
- 472 54. Snitz BE, Wang T, Cloonan YK, Jacobsen E, Chang C-CH, Hughes TF, et al. Risk of progression  
473 from subjective cognitive decline to mild cognitive impairment: the role of study setting. *Alzheimers*  
474 *Dement*. 2018;14(6):734–42.
- 475 55. Reid M, Parkinson L, Gibson R, Schofield P, D’Este C, Attia J, et al. Memory Complaint  
476 Questionnaire performed poorly as screening tool: validation against psychometric tests and affective  
477 measures. *J Clin Epidemiol*. 2012 Feb;65(2):199–205.
- 478 56. Beekman AT, de Beurs E, van Balkom AJ, Deeg DJ, van Dyck R, van Tilburg W. Anxiety and  
479 depression in later life: co-occurrence and communality of risk factors. *Am J Psychiatry*. 2000  
480 Jan;157(1):89–95.

- 481 57. Meeks TW, Jeste DV. Neurobiology of wisdom: a literature overview. *Arch Gen Psychiatry*. 2009  
482 Apr 1;66(4):355-65.
- 483 58. Thomas ML, Bangen KJ, Palmer BW, Sirkin Martin A, Avanzino JA, Depp CA, et al. A new scale  
484 for assessing wisdom based on common domains and a neurobiological model: the San Diego  
485 Wisdom Scale (SD-WISE). *J Psychiatr Res*. 2019 Jan;108:40–7.
- 486 59. Jeste DV, Lee EE. The emerging empirical science of wisdom: definition, measurement,  
487 neurobiology, longevity, and interventions. *Harv Rev Psychiatry*. 2019 Jun;27(3):127–40.
- 488 60. Ardelt M, Jeste DV. Wisdom and hard times: the ameliorating effect of wisdom on the negative  
489 association between adverse life events and well-being. *J Gerontol B Psychol Sci Soc Sci*. 2018  
490 10;73(8):1374–83.
- 491 61. Lee E, Bangen K, Avanzino J, Hou B, Ramsey M, Eglit G, et al. Meta-analysis of randomized  
492 controlled trials to enhance components of wisdom: pro-social behaviors, emotional regulation, and  
493 spirituality. *JAMA Psychiatry*. Forthcoming 2020.
- 494 62. Treichler EBH, Glorioso D, Lee EE, Wu T-C, Tu XM, Daly R, et al. A pragmatic trial of a group  
495 intervention in senior housing communities to increase resilience. *Int Psychogeriatr*. 2020  
496 Feb;32(2):173–82.
- 497 63. Hawkley LC, Cacioppo JT. Loneliness matters: a theoretical and empirical review of consequences  
498 and mechanisms. *Ann Behav Med*. 2010 Oct;40(2):218–27.
- 499 64. Boss L, Kang D-H, Branson S. Loneliness and cognitive function in the older adult: a systematic  
500 review. *Int Psychogeriatr*. 2015 Apr;27(4):541–53.
- 501 65. Tilvis RS, Kähönen-Väre MH, Jolkkonen J, Valvanne J, Pitkala KH, Strandberg TE. Predictors of  
502 cognitive decline and mortality of aged people over a 10-year period. *J Gerontol A Biol Sci Med Sci*.  
503 2004 Mar;59(3):268–74.
- 504 66. Wilson RS, Krueger KR, Arnold SE, Schneider JA, Kelly JF, Barnes LL, et al. Loneliness and risk of  
505 Alzheimer disease. *Arch Gen Psychiatry*. 2007 Feb 1;64(2):234-40.
- 506 67. Nguyen T, Lee E, Daly R, Wu T, Tang Y, Tu X, et al. Predictors of loneliness by age decade: study  
507 of psychological and environmental factors in 2,843 community-dwelling Americans aged 20-69  
508 years. Forthcoming.
- 509 68. Alhola P, Polo-Kantola P. Sleep deprivation: impact on cognitive performance. *Neuropsychiatr Dis  
510 Treat*. 2007 Oct;3(5):553–67.
- 511 69. Vaessen TJA, Overeem S, Sitskoorn MM. Cognitive complaints in obstructive sleep apnea. *Sleep  
512 Med Rev*. 2015 Feb;19:51–8.
- 513 70. Yaffe K, Laffan AM, Harrison SL, Redline S, Spira AP, Ensrud KE, et al. Sleep-disordered  
514 breathing, hypoxia, and risk of mild cognitive impairment and dementia in older women. *JAMA*.  
515 2011 Aug 10;306(6):613–9.
- 516 71. Gosling SD, Vazire S, Srivastava S, John OP. Should we trust web-based studies? A comparative  
517 analysis of six preconceptions about internet questionnaires. *Am Psychol*. 2004 Mar;59(2):93–104.

- 518 72. Berinsky AJ, Huber GA, Lenz GS. Evaluating online labor markets for experimental research:  
519 Amazon.com's Mechanical Turk. *Polit Anal*. 2012;20(3):351–68.
- 520 73. Casler K, Bickel L, Hackett E. Separate but equal? A comparison of participants and data gathered  
521 via Amazon's MTurk, social media, and face-to-face behavioral testing. *Comput Human Behav*. 2013  
522 Nov;29(6):2156–60.
- 523 74. Eriksson K, Simpson B. Emotional reactions to losing explain gender differences in entering a risky  
524 lottery. *Judgm Decis Mak*. 2010;5(3):5.
- 525 75. Ipeirotis PG. Demographics of Mechanical Turk. Rochester, NY: Social Science Research Network;  
526 2010 Mar. Report No.: ID 1585030.
- 527 76. Johnson DR, Borden LA. Participants at your fingertips: using Amazon's Mechanical Turk to  
528 increase student–faculty collaborative research. *Teach Psychol*. 2012 Oct;39(4):245–51.
- 529 77. Rabin LA, Smart CM, Crane PK, Amariglio RE, Berman LM, Boada M, et al. Subjective cognitive  
530 decline in older adults: an overview of self-report measures used across 19 international research  
531 studies. *J Alzheimers Dis*. 2015 Sep 24;48 Suppl 1:S63-86.
- 532 78. Molinuevo JL, Rabin LA, Amariglio R, Buckley R, Dubois B, Ellis KA, et al. Implementation of  
533 subjective cognitive decline criteria in research studies. *Alzheimers Dement*. 2017 Mar;13(3):296–  
534 311.
- 535 79. Janssens ACJW, Kraft P. Research conducted using data obtained through online communities:  
536 ethical implications of methodological limitations. *PLoS Med*. 2012 Oct 23;9(10):e1001328.
- 537 80. Stone A, Bachrach C, Jobe J, Kurtzman H, Cain V. *The science of self-report: Implications for*  
538 *research and practice*. Psychology Press; 1999.
- 539
- 540
- 541

**Table 1. Demographic Characteristics, Physical Health, and Mental Health by Group.**

|                                                                | <b>SCD (n = 771)</b>         | <b>No SCD (n = 2191)</b>     |                                 |          |                       |                                |
|----------------------------------------------------------------|------------------------------|------------------------------|---------------------------------|----------|-----------------------|--------------------------------|
|                                                                | <b>Mean (SD)/Percentage</b>  | <b>Mean (SD)/Percentage</b>  | <b>t or <math>\chi^2</math></b> | <b>p</b> | <b>FDR-adjusted p</b> | <b>Cohen's d or Cramer's V</b> |
| <i>Demographic Characteristics</i>                             |                              |                              |                                 |          |                       |                                |
| Age                                                            | 43.16 (12.97); range = 18-73 | 43.44 (13.47); range = 18-81 | 0.50                            | .62      | .64                   | 0.02                           |
| Gender (% Female)                                              | 482/769 (63%)                | 1186/2187 (54%)              | 18.93                           | < .001   | < .001                | .08                            |
| Years of Education                                             | <u>n = 768</u>               | <u>n = 2185</u>              | 5.00                            | < .001   | < .001                | 0.21                           |
| Less than a high school diploma                                | 4 (<1%)                      | 19 (<1%)                     |                                 |          |                       |                                |
| High school degree or equivalent                               | 392 (51%)                    | 845 (39%)                    |                                 |          |                       |                                |
| Bachelor's degree                                              | 272 (35%)                    | 963 (44%)                    |                                 |          |                       |                                |
| Master's or doctorate                                          | 100 (13%)                    | 358 (16%)                    |                                 |          |                       |                                |
| Race                                                           | <u>n = 766</u>               | <u>n = 2180</u>              | 3.82                            | .43      | .47                   | .04                            |
| African American                                               | 66 (9%)                      | 156 (7%)                     |                                 |          |                       |                                |
| American Indian/Alaska Native                                  | 10 (1%)                      | 12 (<1%)                     |                                 |          |                       |                                |
| Asian                                                          | 40 (5%)                      | 155 (7%)                     |                                 |          |                       |                                |
| Multi-Racial                                                   | 20 (3%)                      | 63 (3%)                      |                                 |          |                       |                                |
| Native Hawaiian or Pacific Islander                            | 3 (<1%)                      | 6 (<1%)                      |                                 |          |                       |                                |
| Other                                                          | 6 (<1%)                      | 20 (<1%)                     |                                 |          |                       |                                |
| White                                                          | 621 (81%)                    | 1768 (81%)                   |                                 |          |                       |                                |
| Latinx origin (% endorsed)                                     | 79/762 (10.4%)               | 196/2175 (9.0%)              | 1.22                            | .27      | .29                   | .02                            |
| Income (per year)                                              | <u>n = 762</u>               | <u>n = 2165</u>              | 3.20                            | .001     | .001                  | 0.14                           |
| < \$35,000                                                     | 397 (52%)                    | 965 (44%)                    |                                 |          |                       |                                |
| \$35,000 – \$74,000                                            | 254 (33%)                    | 834 (38%)                    |                                 |          |                       |                                |
| ≥ \$75,000                                                     | 111 (14%)                    | 366 (17%)                    |                                 |          |                       |                                |
| Married or living in a marriage-like relationship (% endorsed) | 427/771 (55%)                | 1225/2191 (56%)              | .064                            | .80      | .80                   | .01                            |
| Employment status                                              | <u>n = 762</u>               | <u>n = 2178</u>              | 9.05                            | .03      | .04                   | .03                            |
| Employed full time                                             | 462 (60%)                    | 1394 (64%)                   |                                 |          |                       |                                |
| Employed part-time                                             | 118 (15%)                    | 332 (15%)                    |                                 |          |                       |                                |
| Unemployed/unable to work                                      | 87 (11%)                     | 172 (8%)                     |                                 |          |                       |                                |
| Other                                                          | 95 (12%)                     | 280 (13%)                    |                                 |          |                       |                                |
| <i>Physical Health</i>                                         |                              |                              |                                 |          |                       |                                |
| BMI                                                            | 28.33 (7.72)                 | 27.15 (6.51)                 | 3.83                            | < .001   | < .001                | 0.30                           |
| Medications for medical conditions (% endorsed)                | 398/771 (52%)                | 712/2191 (32%)               | 89.02                           | < .001   | < .001                | .17                            |
| Frequency of flossing                                          | --                           | --                           | 6.40                            | < .001   | < .001                | 0.28                           |
| SF-12 Physical Health                                          | 44.41 (10.75)                | 49.32 (9.44)                 | 11.26                           | < .001   | < .001                | 0.49                           |
| PROMIS Sleep Disturbances                                      | 54.03 (8.66)                 | 49.01 (8.92)                 | 13.72                           | < .001   | < .001                | 0.57                           |
| Sleep apnea item (% endorsed)                                  | 104/771 (13%)                | 158/2191 (7%)                | 27.88                           | < .001   | < .001                | .10                            |

| <i>Mental Health</i>           |               |               |       |        |        |      |
|--------------------------------|---------------|---------------|-------|--------|--------|------|
| SF-12 Mental Health            | 39.72 (11.83) | 47.87 (11.15) | 16.70 | < .001 | < .001 | 0.71 |
| CDRS-2 Total                   | 4.95 (1.68)   | 5.76 (1.64)   | 11.70 | < .001 | < .001 | 0.49 |
| PHQ-2 Total                    | 2.51 (1.84)   | 1.21 (1.55)   | 17.54 | < .001 | < .001 | 0.76 |
| GAD-2 Total                    | 2.59 (1.88)   | 1.35 (1.64)   | 16.25 | < .001 | < .001 | 0.70 |
| UCLA Loneliness 4-item         | 9.76 (2.55)   | 8.39 (2.59)   | 12.64 | < .001 | < .001 | 0.53 |
| CES-D Happiness Scale          | 6.47 (3.36)   | 8.71 (3.23)   | 16.31 | < .001 | < .001 | 0.68 |
| SD-WISE Total                  | 3.54 (0.49)   | 3.78 (0.49)   | 11.34 | < .001 | < .001 | 0.49 |
| Decisiveness                   | 3.13 (0.90)   | 3.59 (0.87)   | 12.47 | < .001 | < .001 | 0.52 |
| Emotional Regulation           | 3.00 (0.82)   | 3.56 (0.82)   | 16.53 | < .001 | < .001 | 0.68 |
| Pro-Social Behaviors           | 3.82 (0.65)   | 4.01 (0.64)   | 7.22  | < .001 | < .001 | 0.29 |
| Social Advising                | 3.57 (0.71)   | 3.68 (0.63)   | 4.26  | < .001 | < .001 | 0.16 |
| Tolerance for Divergent Values | 3.84 (0.67)   | 3.88 (0.63)   | 1.44  | .15    | .17    | 0.06 |
| Social Self-Efficacy           | 12.85 (3.43)  | 13.86 (3.27)  | 7.28  | < .001 | < .001 | 0.30 |

*Note.* BMI = body mass index; CDRS = Connor Davidson Resilience Scale-2 item; CES-D = Center for Epidemiologic Studies-Depression scale; GAD-2 = Generalized Anxiety Disorder scale, 2-item; PHQ-2 = Patient Health Questionnaire, 2-item; PROMIS = Patient-Reported Outcomes Measurement Information System; SCD = subjective cognitive decline; SD-WISE = San Diego Wisdom Scale; UCLA = University of California Los Angeles.
